# Supplementary material for: Genomic and transcriptomic profiling of radioresistant prostate and head and neck cancers implicate a BAHD1-dependent modification of DNA damage at the heterochromatin
Source: PubMed Central journal article supplement (PMC11668898; doi:10.1038/s41419-024-07316-y), 2024-12-24

Figure 3 (22Rv1)

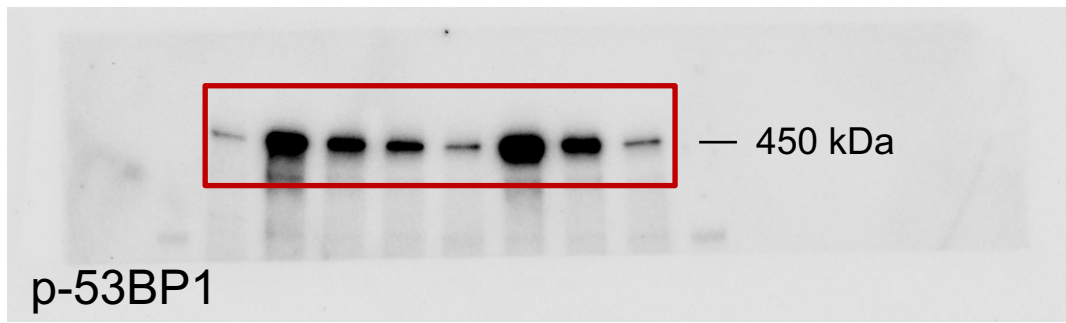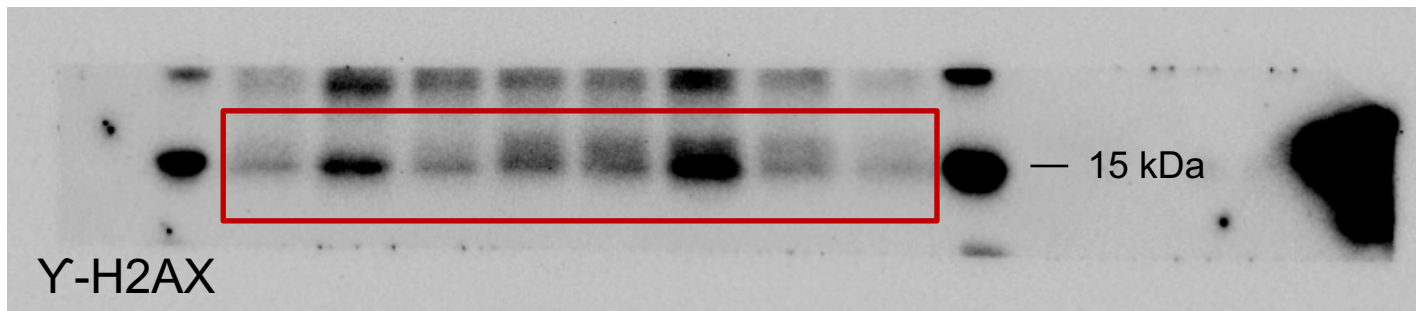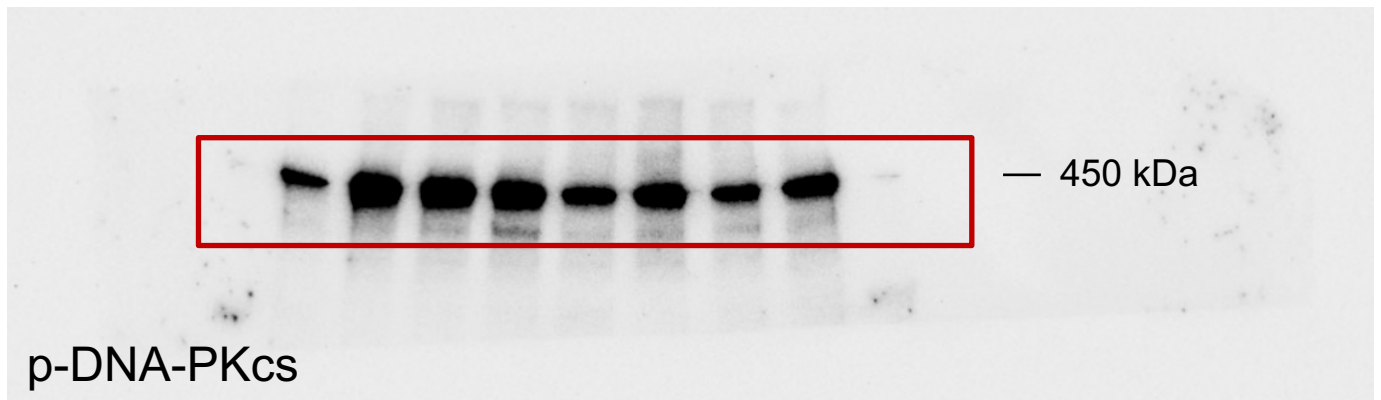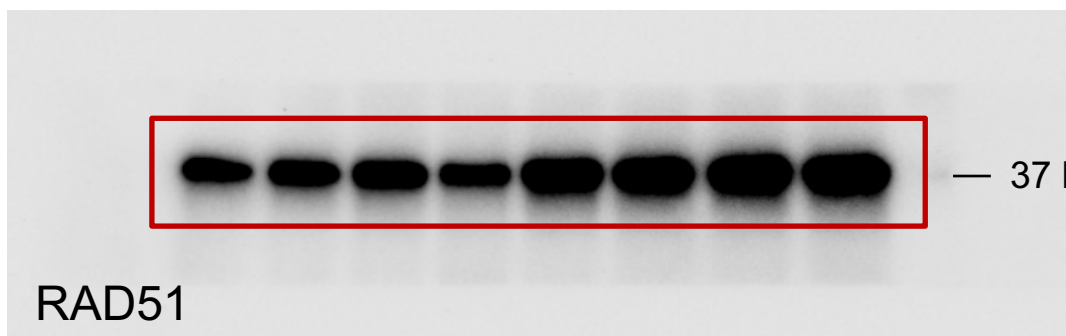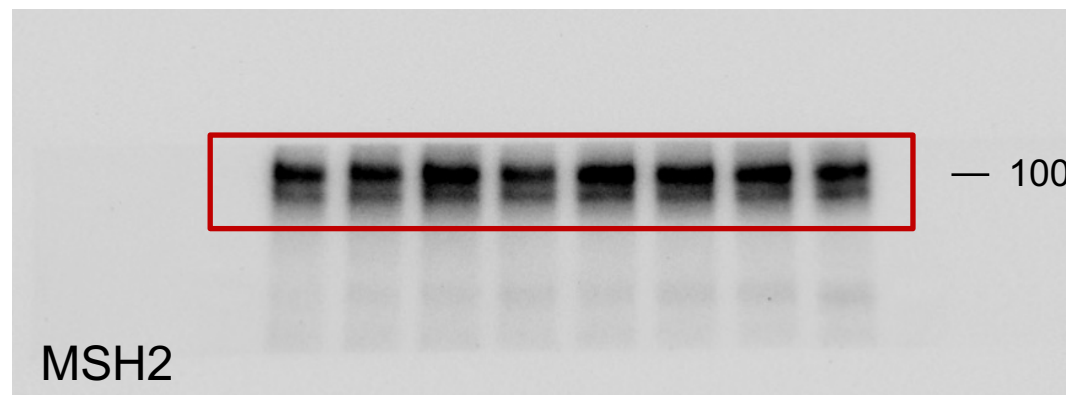

Figure 3 (22Rv1)

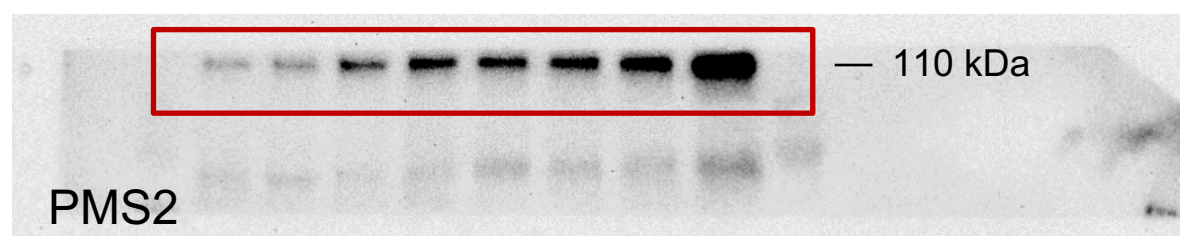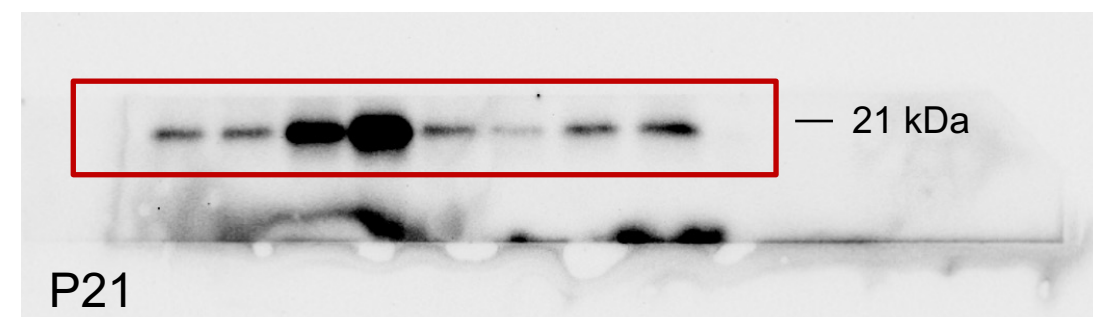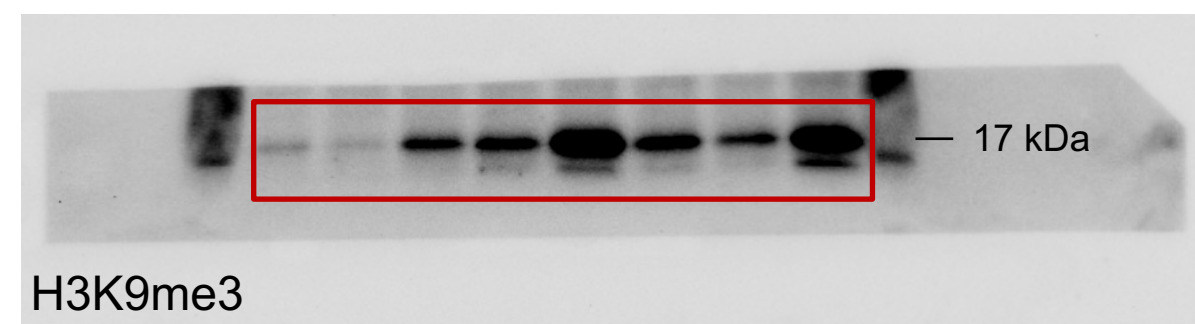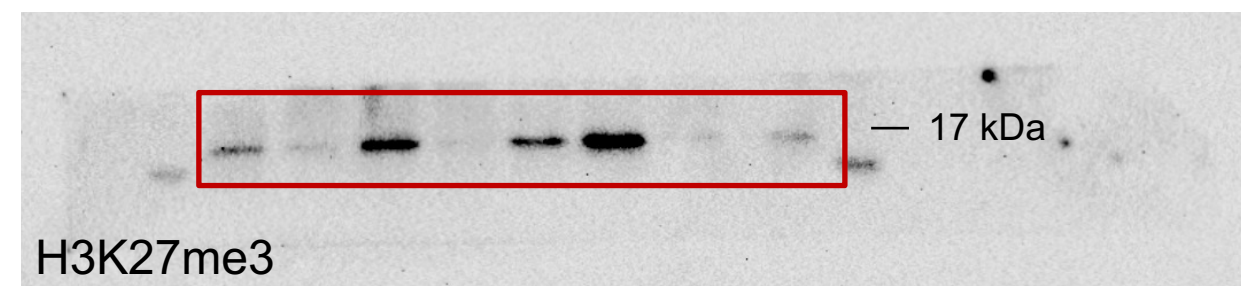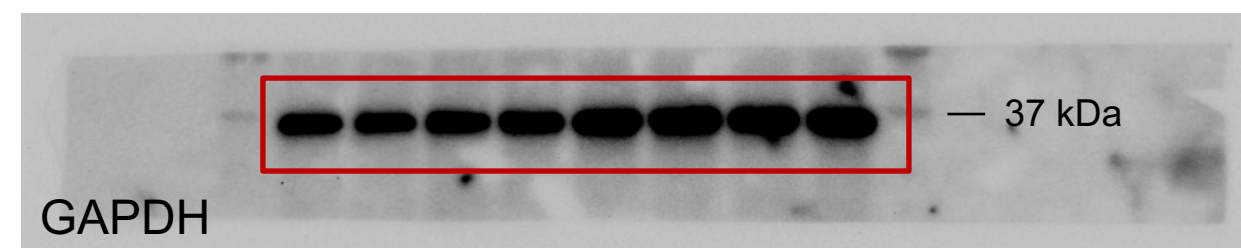

Figure 3 (FaDu)

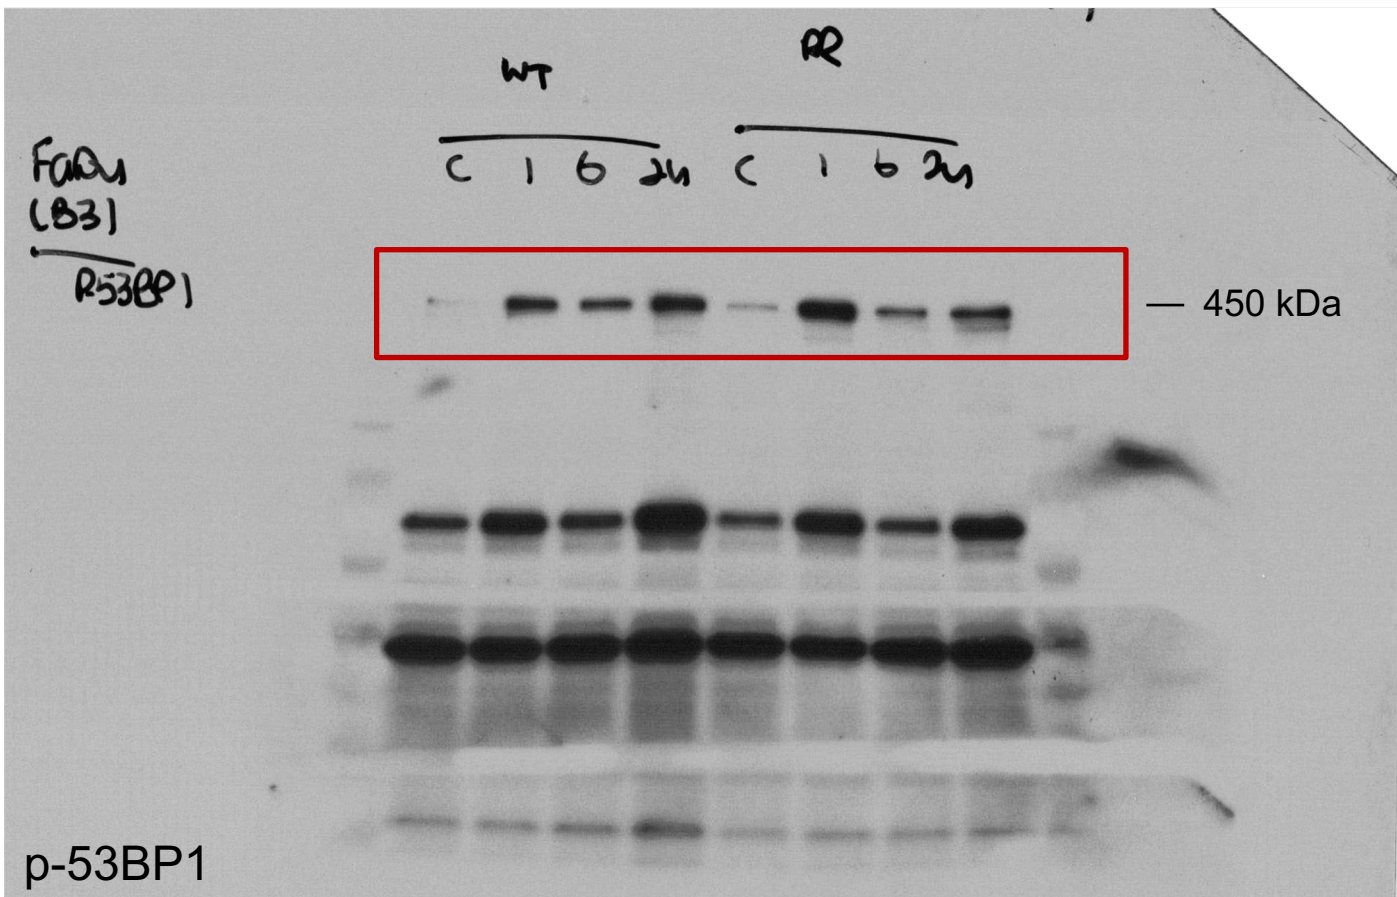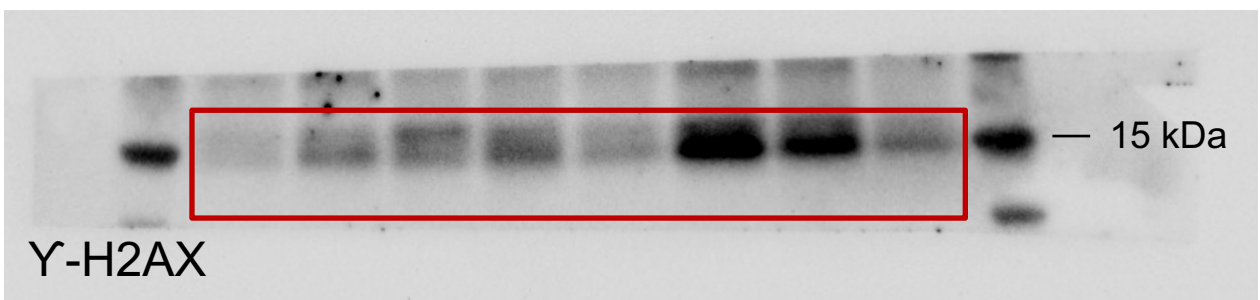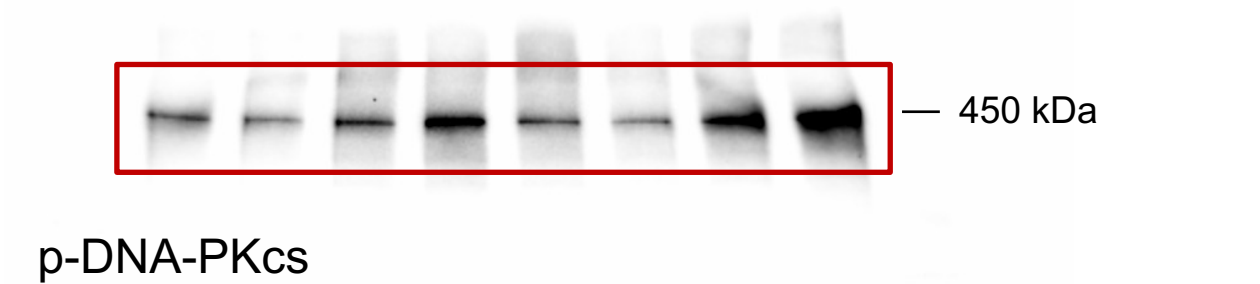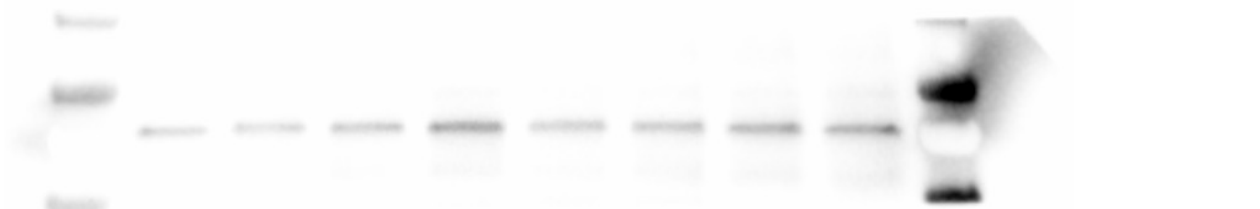

Figure 3 (FaDu)

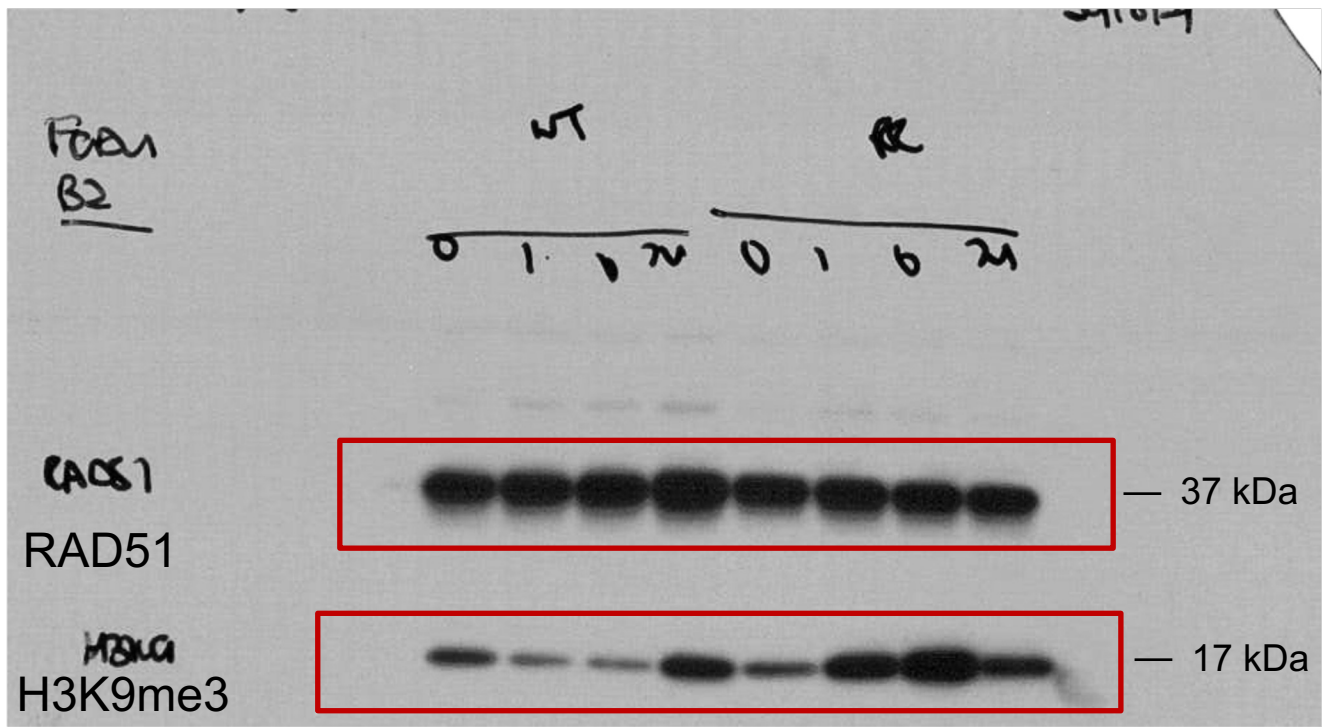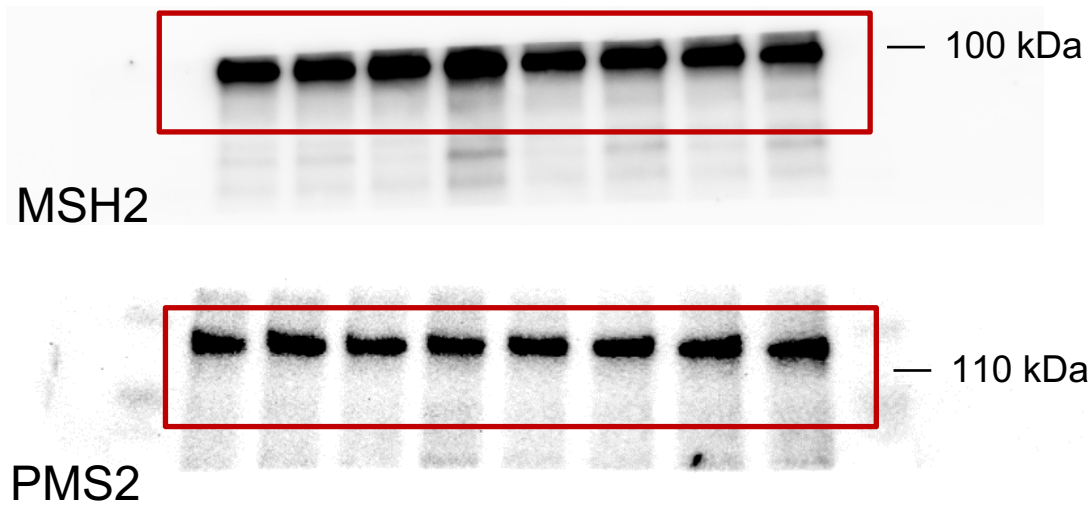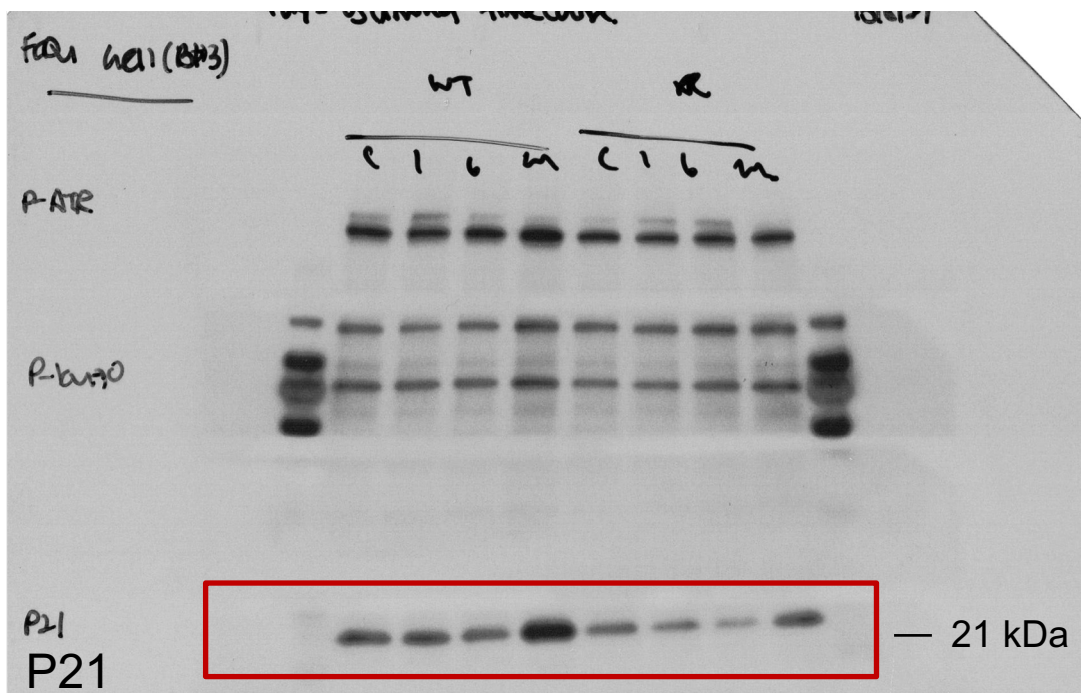

Figure 3 (FaDu)

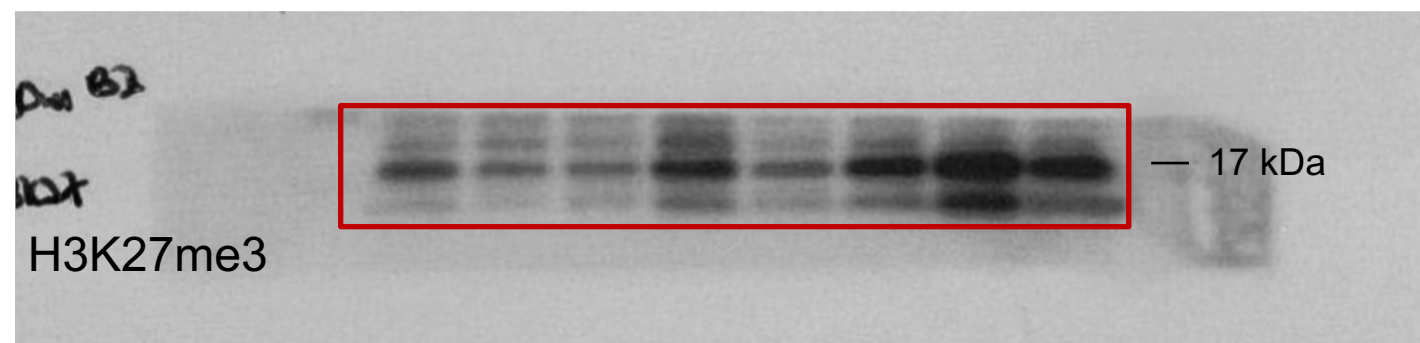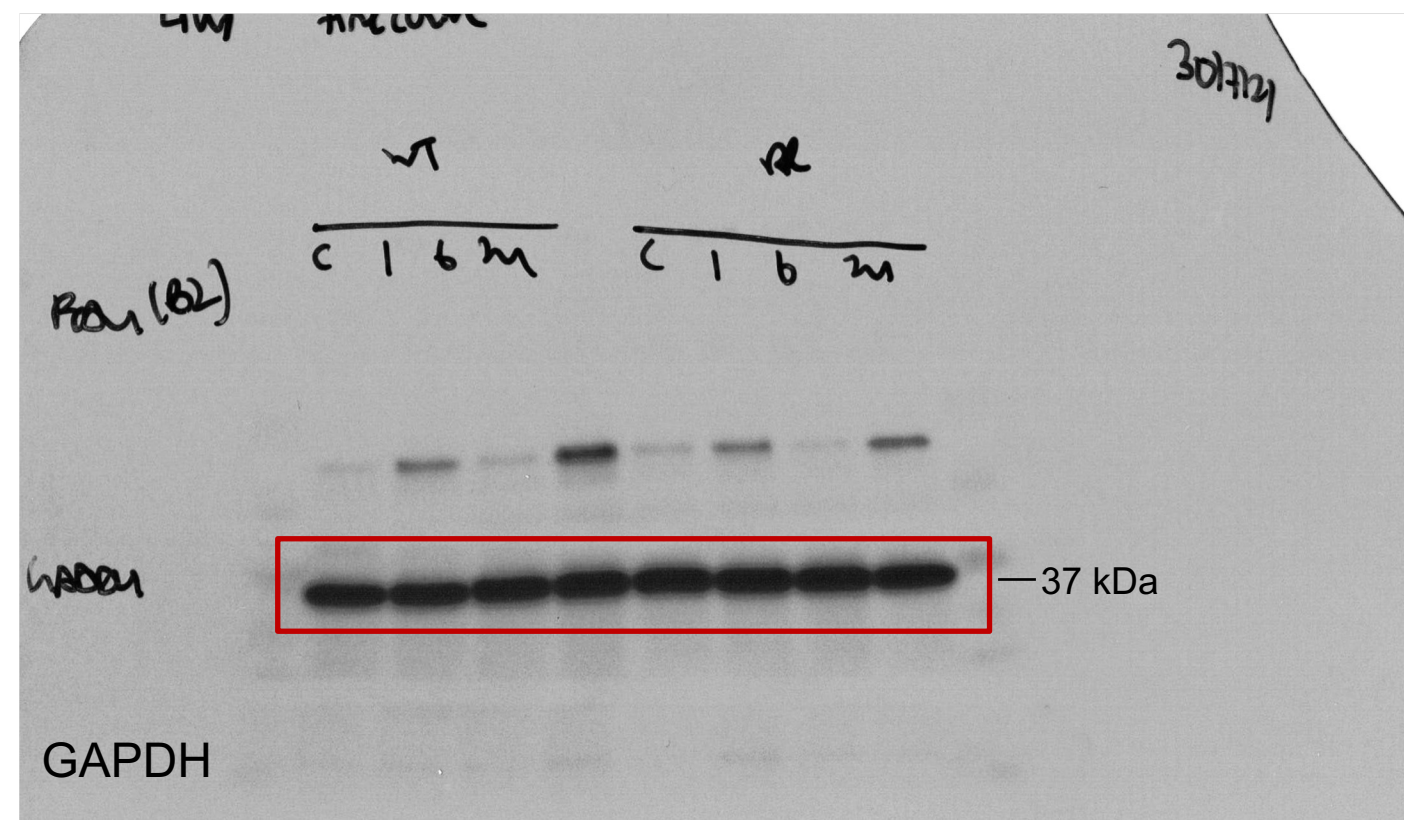

Supplementary Figure S4 (22Rv1 and FaDu)

22Rv1

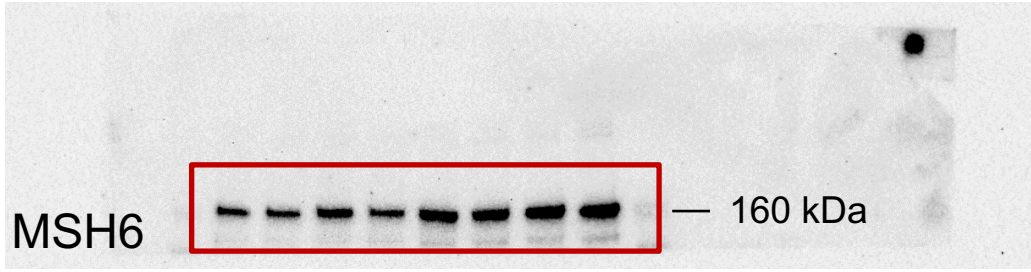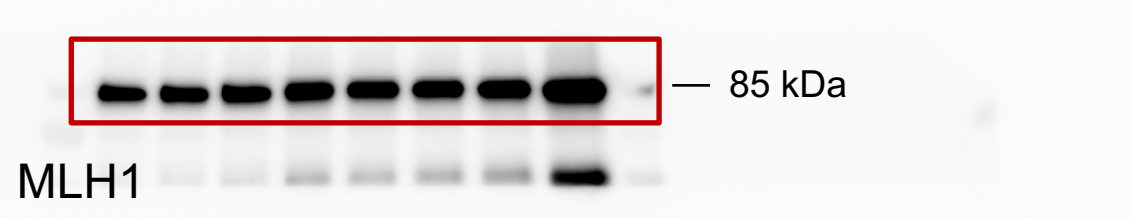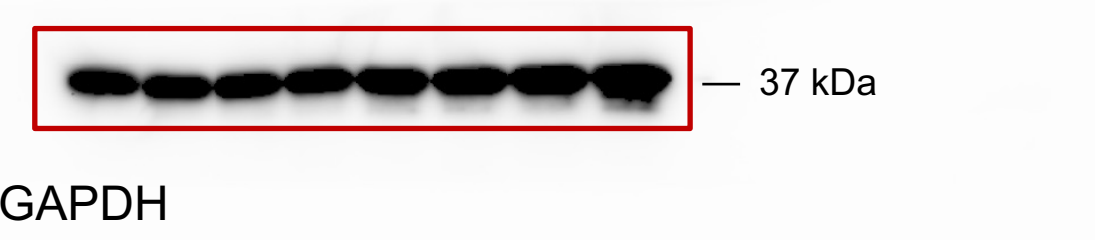

FaDu

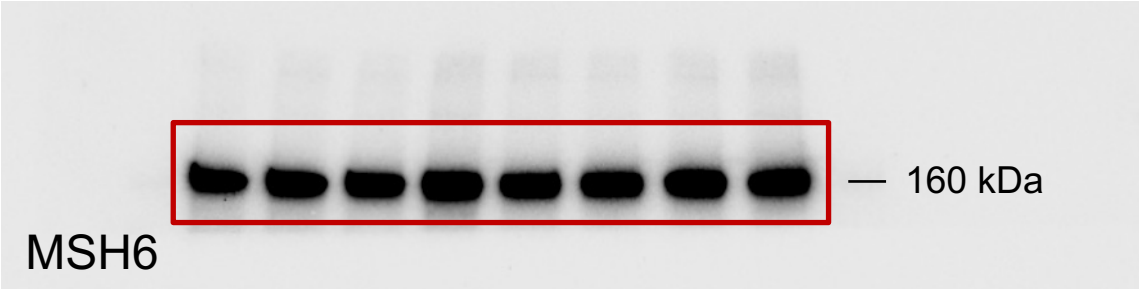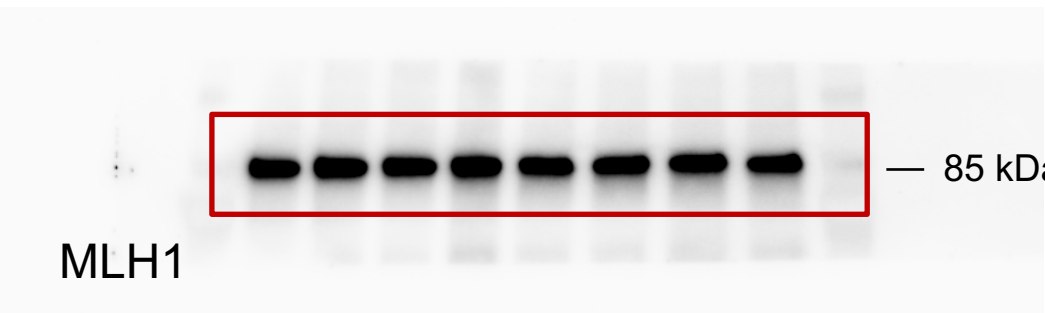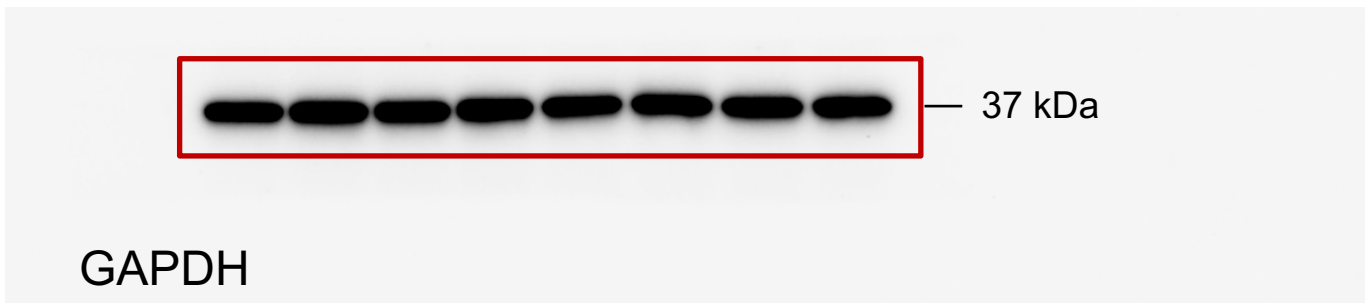

Figure 4, Supplementary Figure S7 and S8 (22Rv1 and FaDu)

### 22Rv1

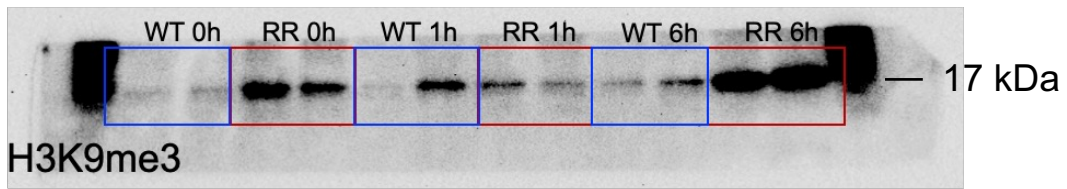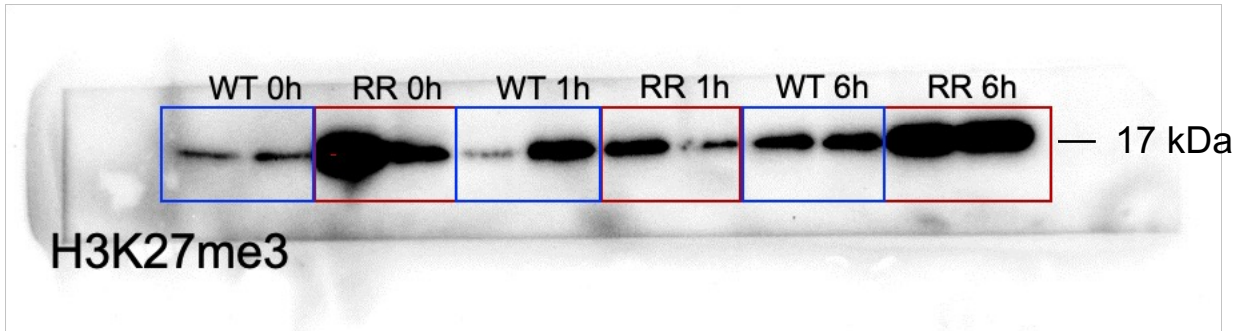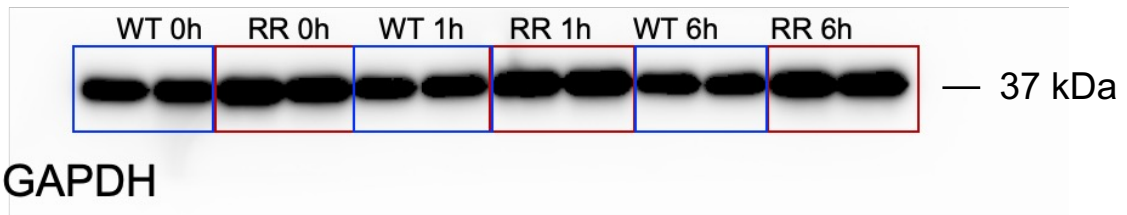

### FaDu

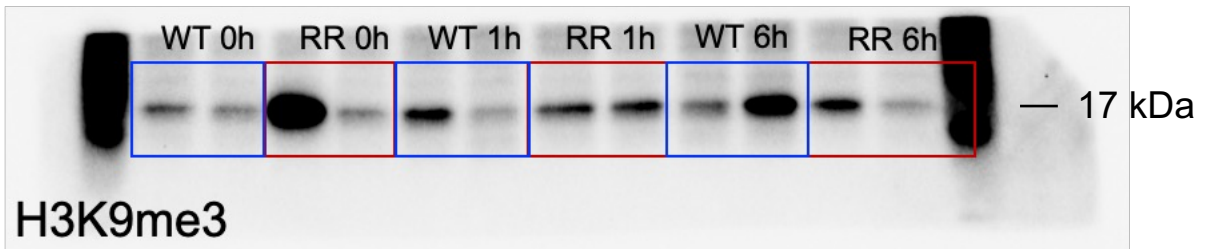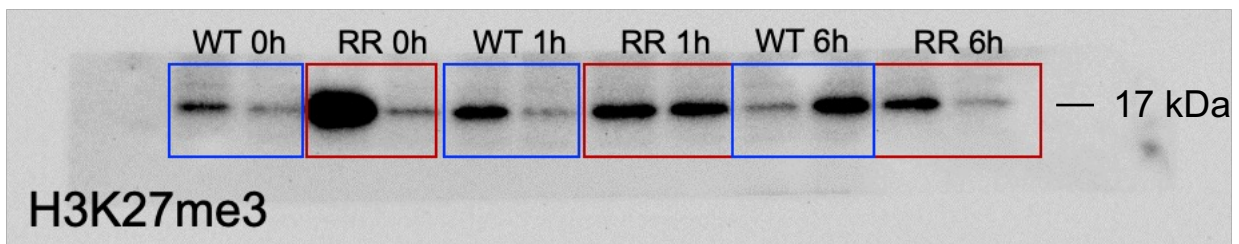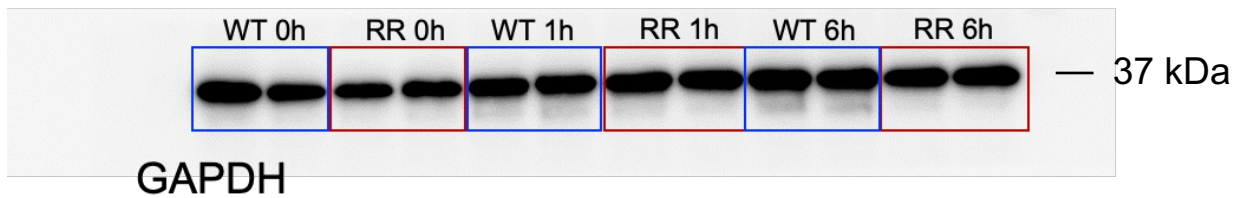

Figure 5 and Supplementary Figure S9 (22Rv1)

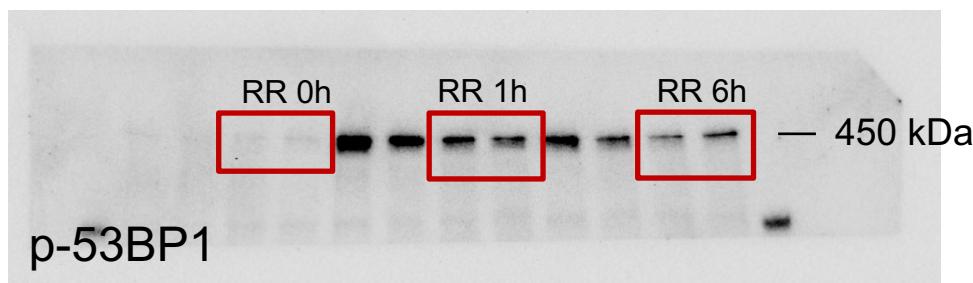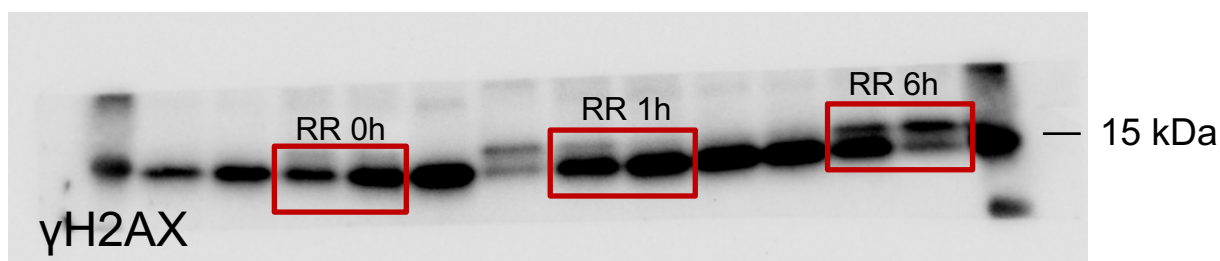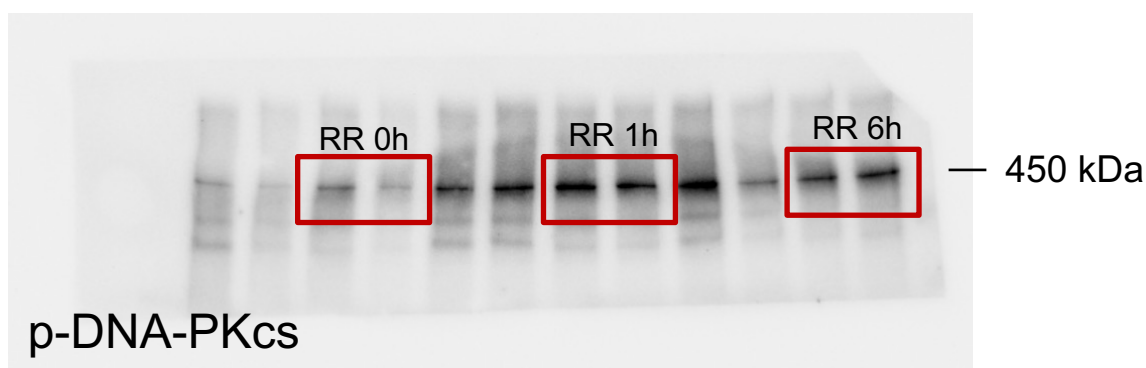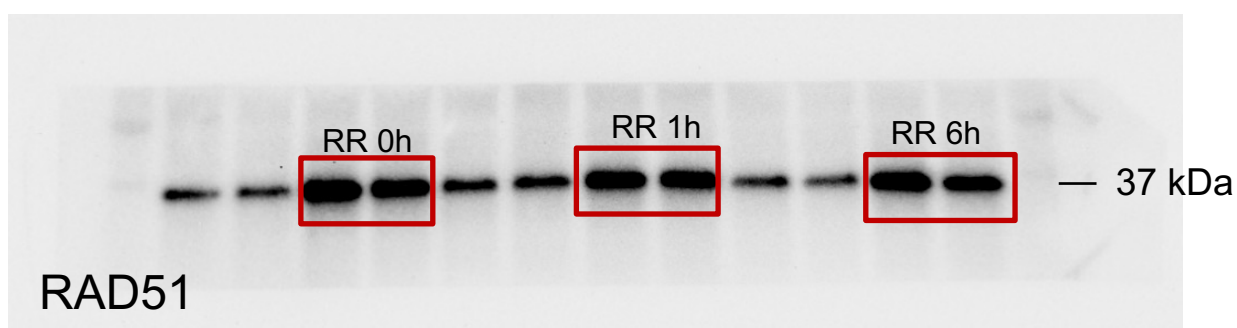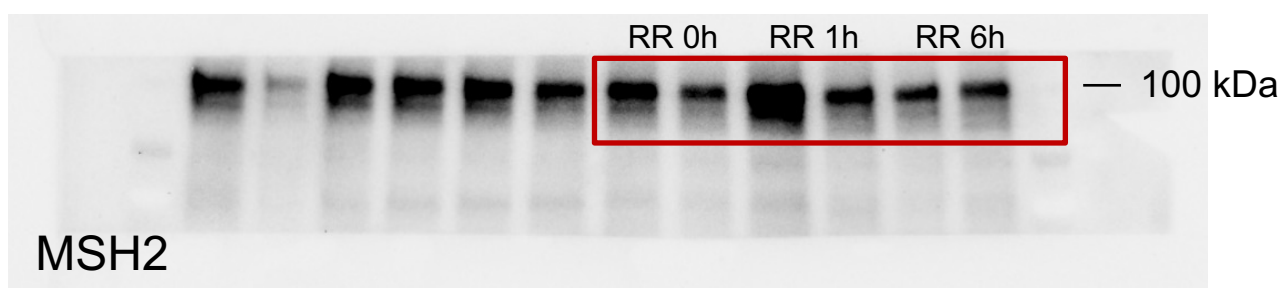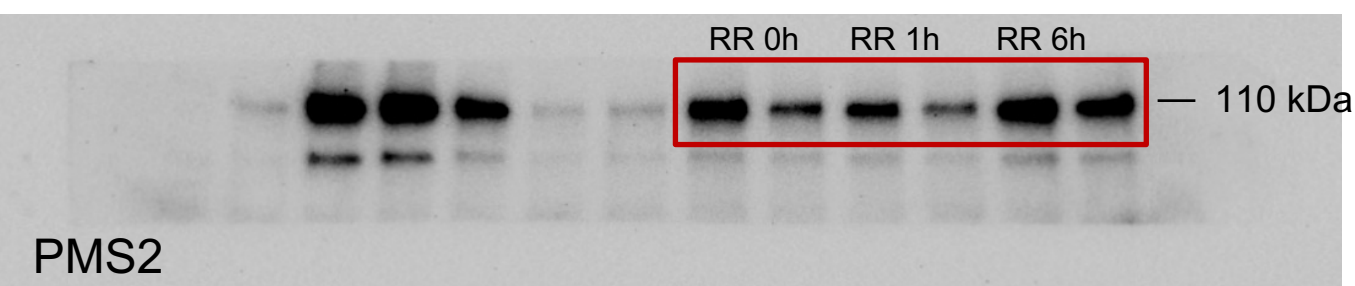



Figure 5 and Supplementary Figure S9 (22Rv1)

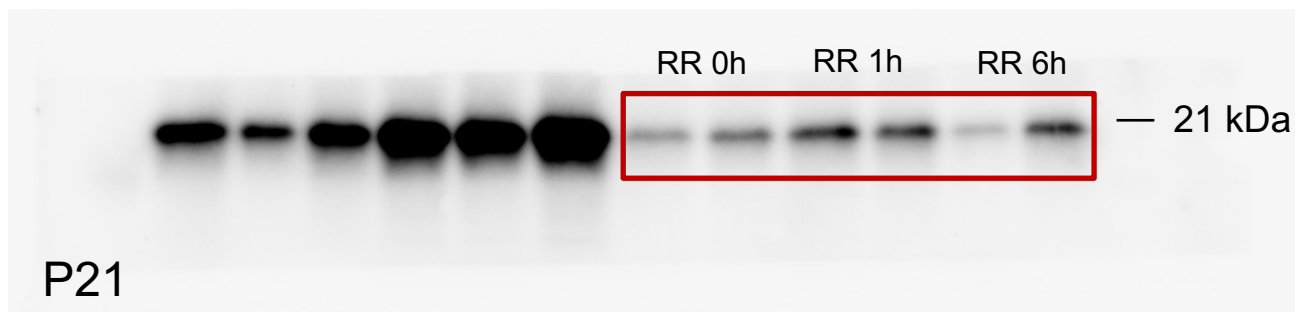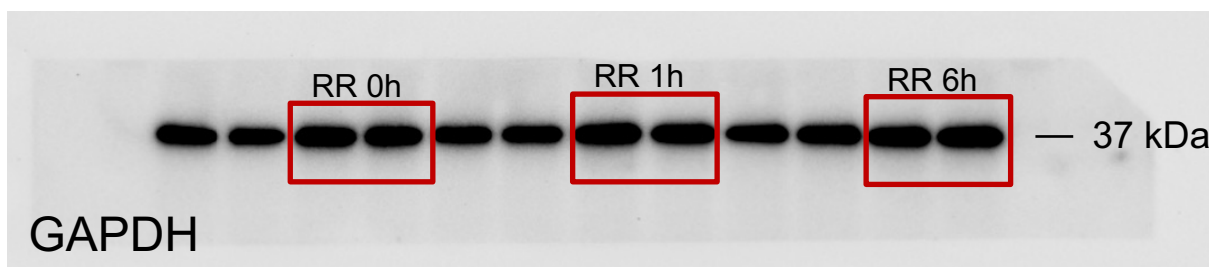

Figure 5 and Supplementary Figure S9 (FaDu)

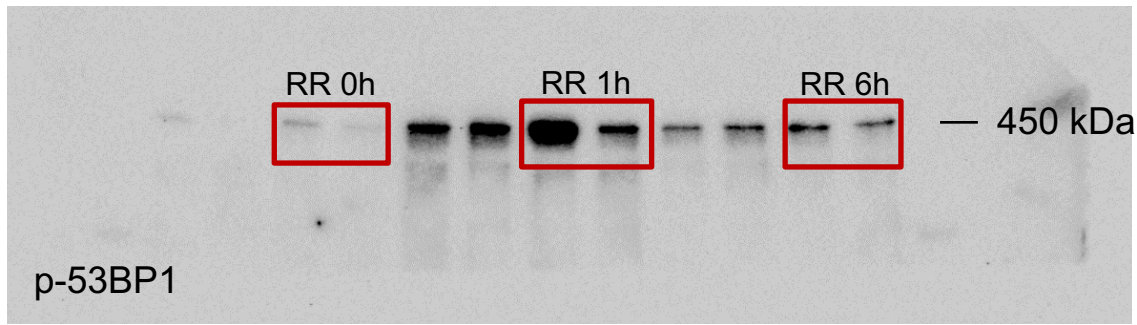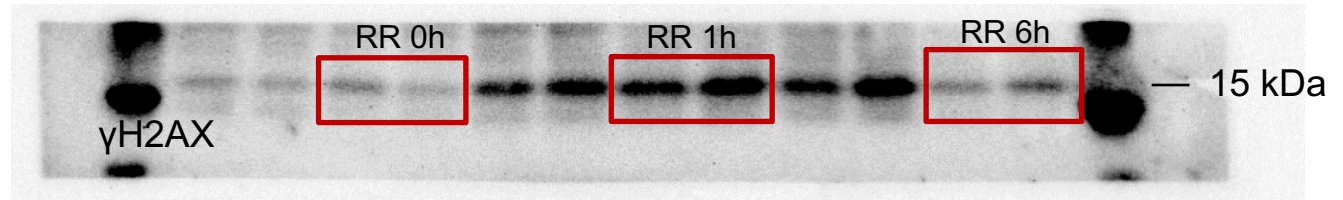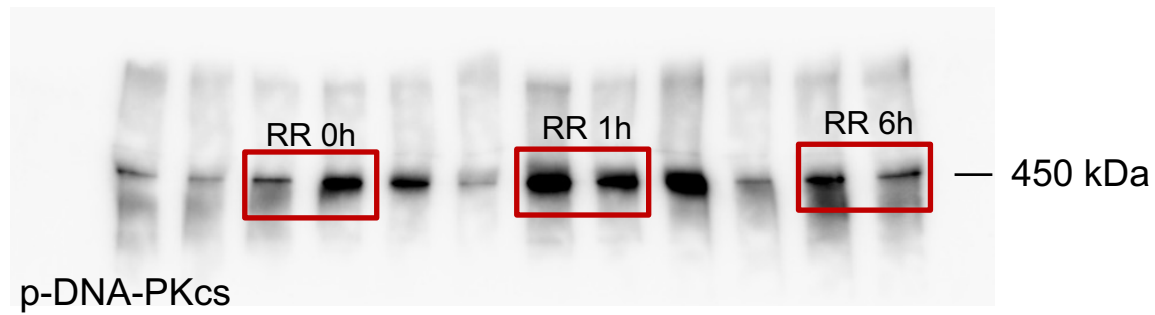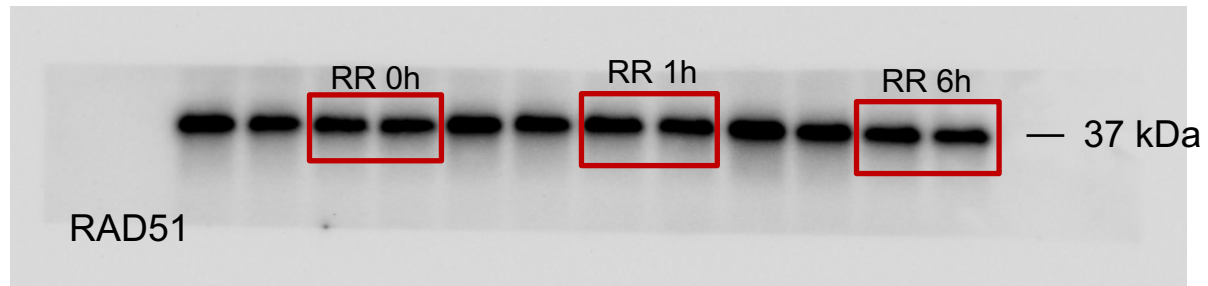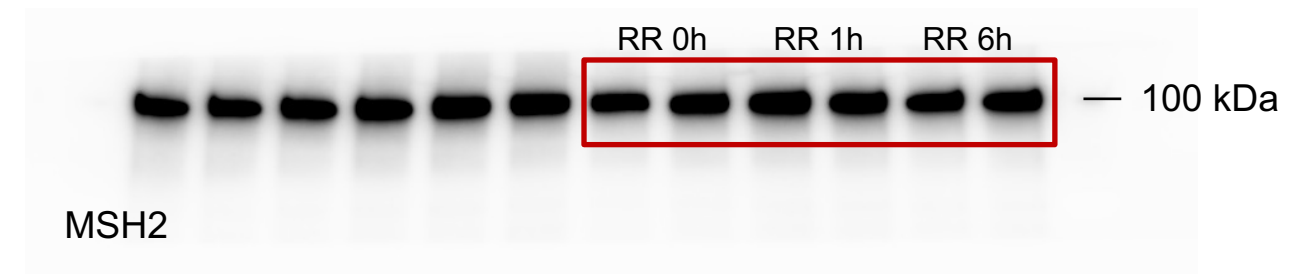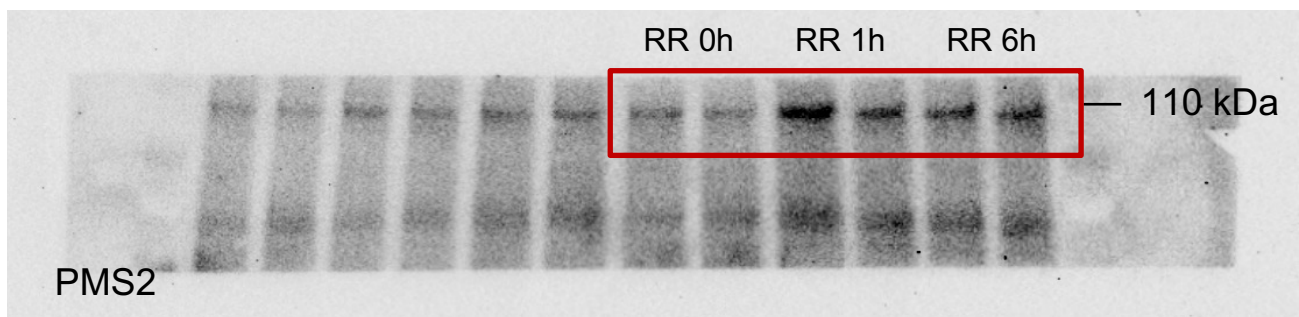

Figure 5 and Supplementary Figure S9 (FaDu)

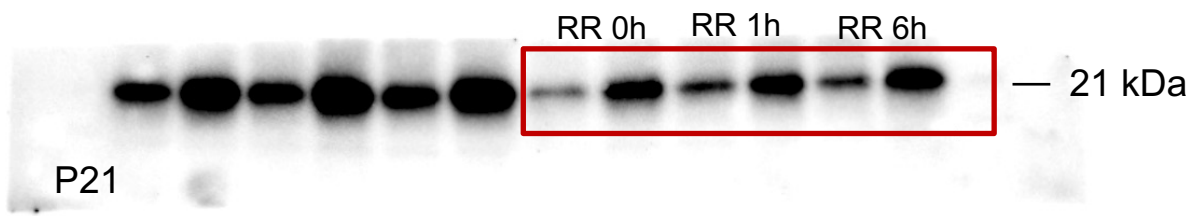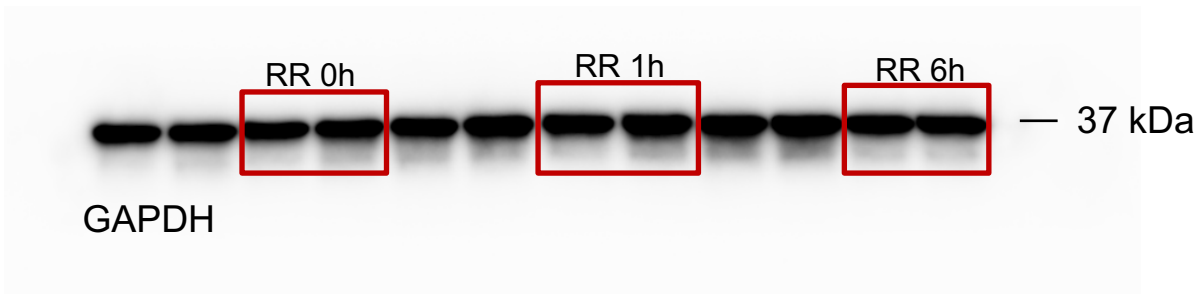

Supplement: 41419_2024_7316_MOESM2_ESM.pdf [file 41419_2024_7316_MOESM2_ESM.pdf]
